# Supplementary material
Source: PubMed Central journal article supplement (PMC5652601)

SUPPLEMENTARY DATA

**Supplementary Table S1.** Antibodies, Source, and working dilution

| Antibody   | Company                  | Catalogue Number | Dilution |
|------------|--------------------------|------------------|----------|
| 4-HNE      | Abcam                    | Ab464545         | 1:100    |
| GPX        | Santa Cruz Biotechnology | sc-22145         | 1:200    |
| Nrf2       | Santa Cruz Biotechnology | sc-722           | 1:200    |
| Galectin 3 | Biolegend                | 125402           | 1:100    |
| Glucagon   | Santa Cruz Biotechnology | sc-13091         | 1:300    |
| Insulin    | Dako                     | A0564            | 1:500    |

SUPPLEMENTARY DATA

**Supplementary Table S2. Docking scores of ML127 and ML351 with the human proteome for which comprehensive structural data are available.**

Download or view data at: <https://iu.app.box.com/v/SupplTableS2>

SUPPLEMENTARY DATA

**Supplementary Table S3. Genes significantly altered ( $P < 0.05$ ,  $FDR < 0.05$ ) in comparison between islets treated with pro-inflammatory cytokines (PIC) and pro-inflammatory cytokines + ML353 (PIC+ML).**

Download or view data at: <https://iu.app.box.com/v/SupplTableS3>

## SUPPLEMENTARY DATA

**Supplementary Figure S1. Transcriptome analysis of mouse islets treated with cytokines and ML351.** Mouse islets were treated for 24 hrs with vehicle (NT), 10  $\mu$ M of ML351 (ML351), cytokines (cyto), cytokines+10  $\mu$ M of ML351(cyto+ML351). **(A)**, Principal component analysis of RNA sequencing results. **(B and C)**, Volcano plots of RNA sequencing analysis. Data are from N=3 biologic replicates.

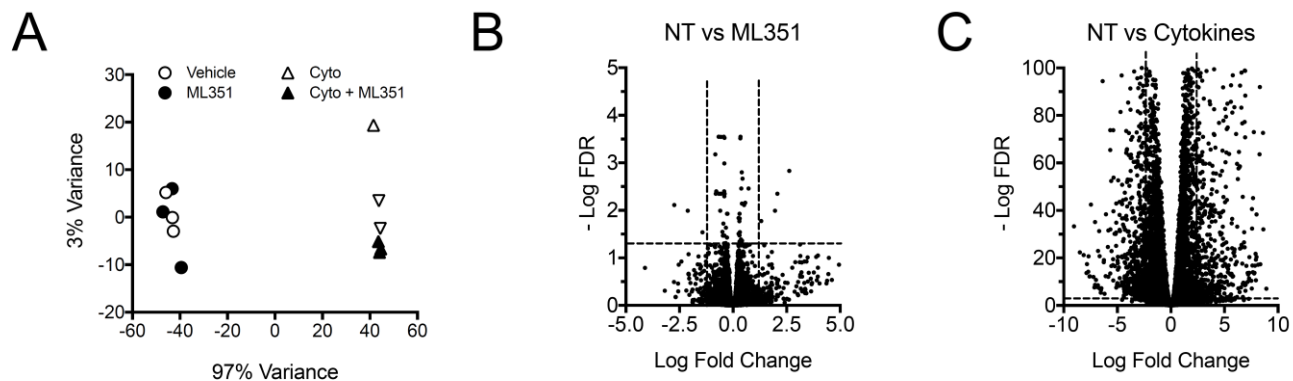

SUPPLEMENTARY DATA

**Supplementary Figure S2. Galectin 3 immunostaining of pancreas of CD1 and NOD mice.**

Fixed pancreatic sections from CD1 and NOD mice treated with vehicle or 24 mg/kg ML351 were subjected to immunofluorescence staining. Shown are representative images (*left panel*) and galectin-3-positive cells as a percent of cellular infiltrate (*right panel*) from analysis of at least three animals per group. Galectin-3 (Gal-3, *magenta*), insulin (*green*), and DAPI (*blue*). Magnification  $\times 200$ , scale bar  $100 \mu\text{m}$ .  $*P < 0.05$  compared to NOD-MO.

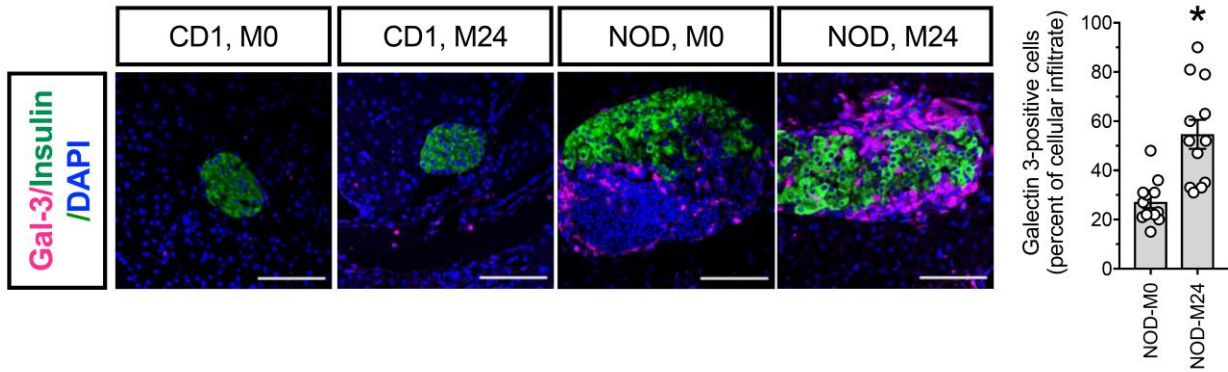

Supplement: DB170215SupplementaryData1.pdf [file DB170215SupplementaryData1.pdf]
